# Supplementary material
Source: Springer Nature journal article supplement (https://www.springermedizin.de/resource/supplementary/12943_2010_662_MOESM4_ESM.pdf/9554510)

**A) MDA-MB-468**

**B) SK-BR-3**

Lysate input

IP PAb1620

IP PAb240

Control  
Cisplatin  
LA-12  
17-AAG

Control  
Cisplatin  
LA-12  
17-AAG

Control  
Cisplatin  
LA-12  
17-AAG

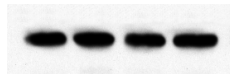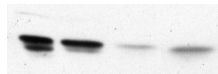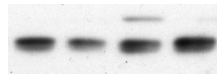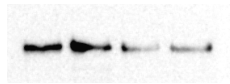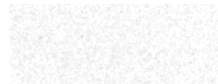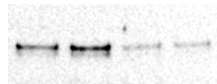

Supplement: MOESM4 [file 9554510]
